# Supplementary material for: Downregulation of HOPX promotes the invasion and migration abilities of hepatocellular carcinoma cells through EMT-related transcription factor SNAIL
Source: Research Square preprint supplement (doi:10.21203/rs.3.rs-6140393/v1), 2025-04-01
Supplement: Supplementary file 1 [file 05a32d7e097ed52f6ebc5b98.docx]

Supplementary Table 1. Sequences of primers.

| Gene | Sequence (5’ to 3’) |
| --- | --- |
| qPCR primers |  |
| HOPX-F | CACCACGCTGTGCCTCAT |
| HOPX-R | CCATTTCTGGGTCTCCTCC |
| SNAIL-F | TAATCCAGAGTTTACCTTCCAGC |
| SNAIL-R | CTCATCTGACAGGGAGGTCAG |
| SLUG-F | CCCTGAAGATGCATATTCGGA |
| SLUG-R | CTGCAAATGCTCTGTTGCAG |
| ZEB1-F | TCACTAGTGTTTACCAGAACAGTG |
| ZEB1-R | GAACACTGTTCTGGTCAGCA |
| ZEB2-F | CTACAAGCGCTTGACATCAC |
| ZEB2-R | TAGCATTTGGTGCTGATCTGTC |
| siRNA sequences |  |
| siRNA-NC-F | 5’-UUCUCCGAACGUGUCACGUTT-3’ |
| siRNA-NC-R | 5’-ACGUGACACGUUCGGAGAATT-3’ |
| si-HOPX-1-F | 5’-GAAGCUAUGUGUAUCUUCUTT-3’ |
| si-HOPX-1-R | 5’-AGAAGAUACACAUAGCUUCTT-3’ |
| si-HOPX-2-F | 5’-CCCUAAGUCACUUUCCUUATT-3’ |
| si-HOPX-2-R | 5’-UAAGGAAAGUGACUUAGGGTT-3’ |
